# Supplementary material for: Cube-octameric silsesquioxane-mediated cargo peptide delivery into living cancer cells
Source: Royal Society of Chemistry journal article supplement (doi:10.1039/c2ob26808f), 2012-12-07
Supplement: c2ob26808f.pdf [file c2ob26808f.pdf]

## Supplemental Information

### Cube-octameric silsesquioxane-mediated cargo peptide delivery into living cancer cells

Sebastian Hörner, Sebastian Fabritz, Henry D. Herce, Olga Avrutina, Christian Dietz, Robert W. Stark, M. Cristina Cardoso, and Harald Kolmar

#### Content

##### Compound 2 (Fmoc-L-cysteine heptaamino-COSS) and 2a (Fmoc-(S-trityl)-L-cysteine heptaamino-COSS)

- 10 Fig. S1: Chemical structure of trityl protected (**2a**) and unprotected Fmoc-L-cysteine heptaamino-COSS **2**  
Fig. S2: Analytical RP-HPLC traces of trityl protected (**2a**) and unprotected Fmoc-L-cysteine heptaamino-COSS **2**  
Fig. S3: HR-MS measurement of compound **2a**  
Fig. S4: LC-MS (ESI) measurement of compound **2**

##### 15 Compound 3 (fluorescein-labeled PCNA binding peptide)

- Fig. S5: Amino acid sequence and chemical structure of fluorescein-labeled PCNA binding peptide **3**  
Fig. S6: Analytical HPLC traces of fluorescein-labeled PCNA binding peptide **3**  
Fig. S7: LC-MS (ESI) measurements of the purified and fluorescein-labeled PCNA binding peptide **3**

##### 20 Compound 4 (PCNA binding peptide coupled to Fmoc-L-cysteine heptaamino-COSS)

- Fig. S8: Chemical structure of compound **4**  
Fig. S9: Analytical RP-HPLC traces of compound **4**  
Fig. S10: HR-MS measurement of a compound **4**  
Fig. S11: FT-IR spectrum of compound **4**

25

##### Compound 5 (L-cysteine- $\beta$ -alanine-fluorescein heptaamino-COSS), 5a (L-cysteine-(S-trityl)- $\beta$ -alanine-fluorescein), and 5b (L-cysteine-(S-trityl)- $\beta$ -alanine-fluorescein heptaamino-COSS)

- Fig. S12: Chemical structure of compound **5a**  
30 Fig. S13: Analytical RP-HPLC traces of compound **5a**  
Fig. S14: LC-MS (ESI) measurement of compound **5a**  
Fig. S15: Chemical structure of trityl-protected (**5b**) and unprotected L-cysteine- $\beta$ -alanine-fluorescein heptaamino-COSS **5**  
Fig. S16: LC-MS (ESI) measurement of L-cysteine-(S-trityl)- $\beta$ -alanine-fluorescein heptaamino-COSS **5b**  
Fig. S17: Analytical RP-HPLC traces and MS analysis of L-cysteine-(S-trityl)- $\beta$ -alanine-fluorescein heptaamino-COSS **5**

35

##### Microirradiation experiment and subsequent co-localization of fluorescently labeled PCNA-binding peptide and RFP-labeled PCNA after the addition of compound 4

- Fig. S18: Fluorescence microscopic analysis of irradiated HeLa cells

40

45

50

55

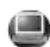

**Compound 2 (Fmoc-L-cysteine heptaamino-COSS) and 2a (Fmoc-(S-trityl)-L-cysteine heptaamino-COSS)**

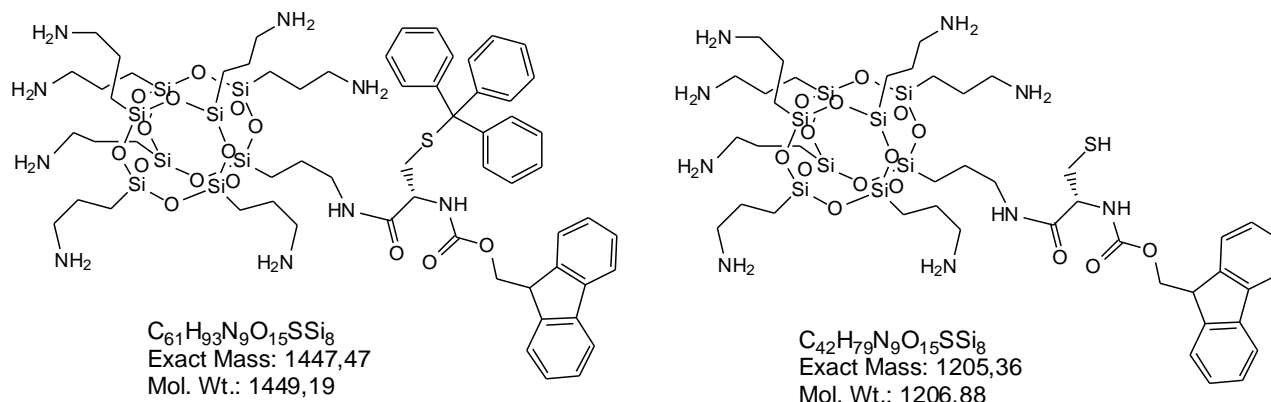

**Fig. S1:** Chemical structure of Fmoc-(S-trityl)-L-cysteine heptaamino-COSS **2a** (left) and unprotected Fmoc-L-cysteine heptaamino-COSS **2** (right).

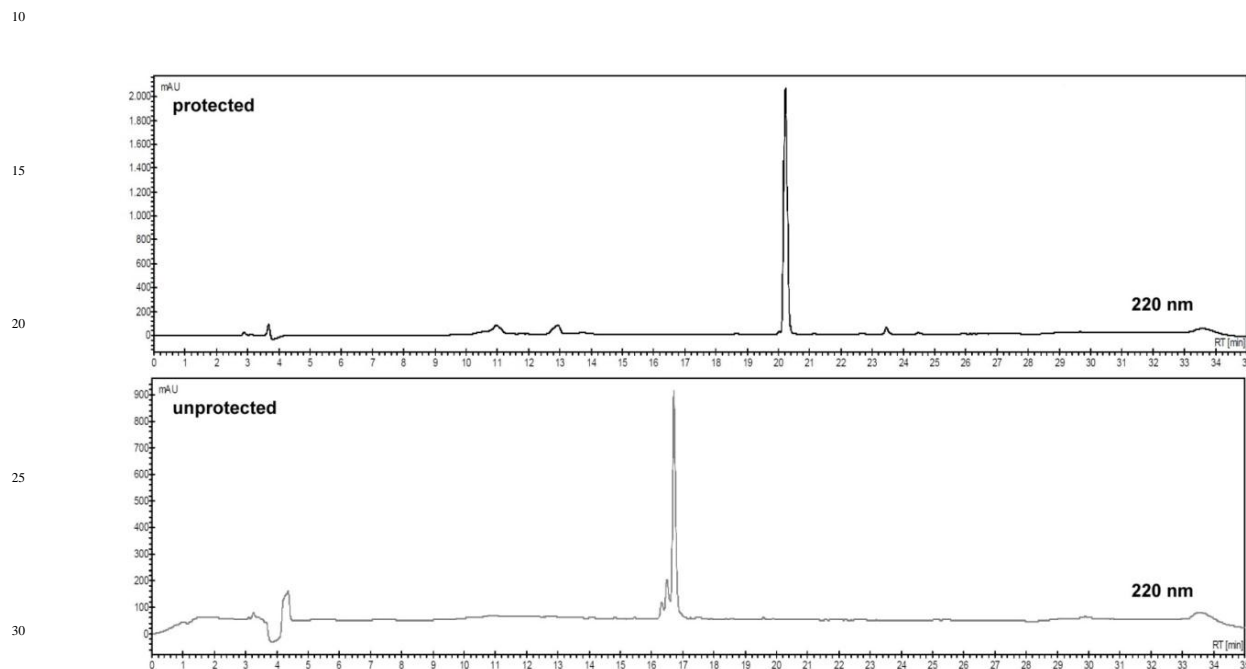

**Fig. S2:** Analytical RP-HPLC traces of trityl-protected (**2a**) and deprotected Fmoc-L-cysteine heptaamino-COSS **2**. (Varian 940-LC equipped with a Phenomenex Luna C<sub>18</sub> column (5 $\mu$ , 100 A, 250 $\times$ 4.60 mm, 5  $\mu$ m). Eluent A: 0.1% aq. trifluoroacetic acid (TFA), eluent B: 90 % aq. acetonitrile in 0.1% aq. TFA; 10  $\rightarrow$  80% B in 20 min preceded by 5 min isocratic 10 % B at a flow rate of 1 mL min<sup>-1</sup>).

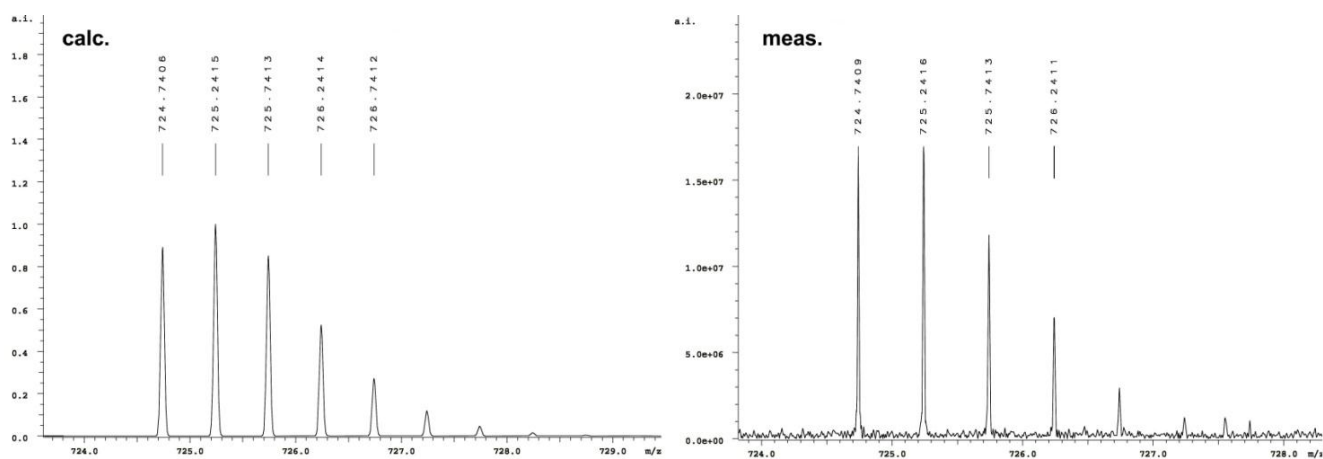

**Fig. S3:** HR-MS measurement of compound **2a**; left: calculated isotopic pattern  $[M+2H]^{2+} = 724.7406$ ; right: measured isotopic pattern  $[M+2H]^{2+} = 724.7409$ .

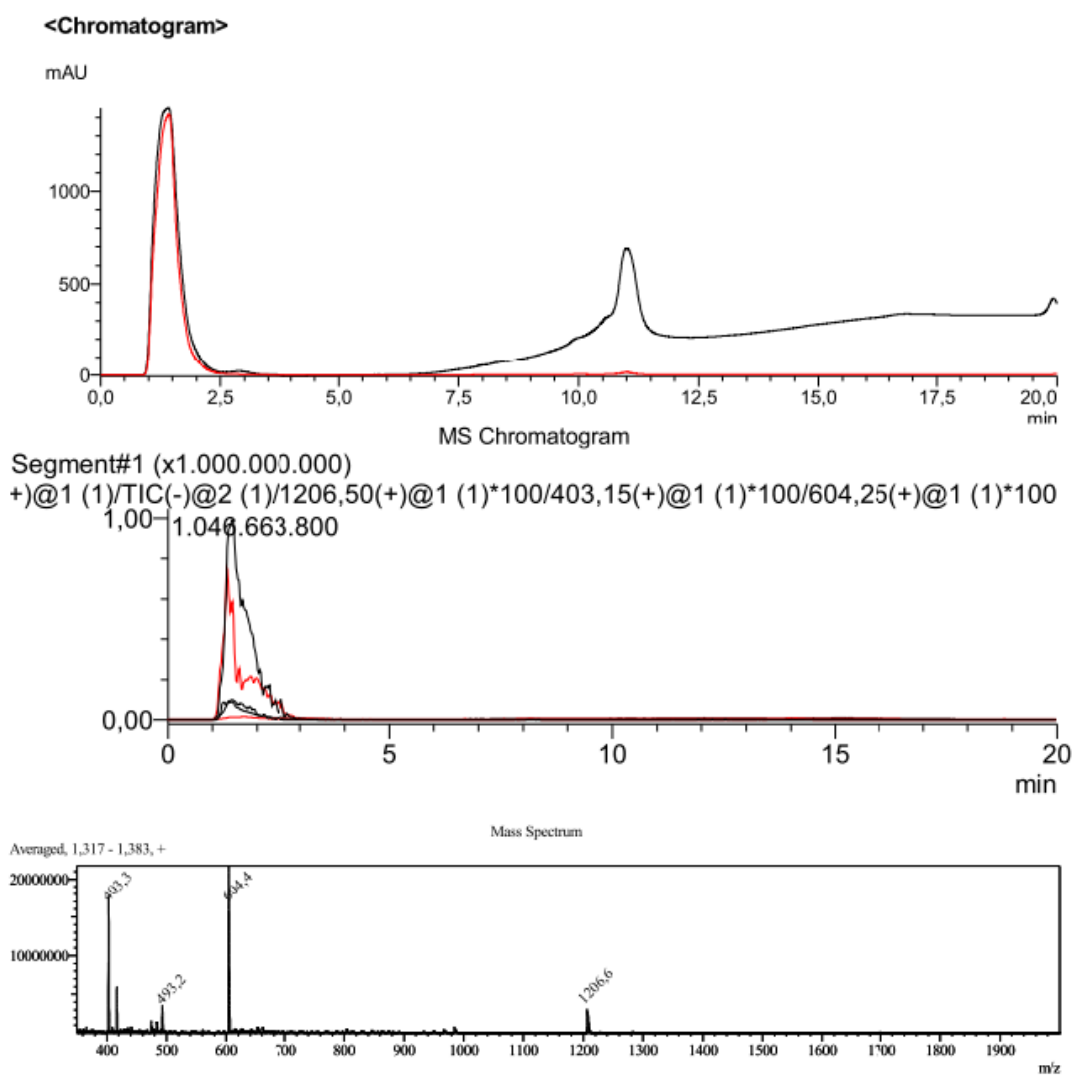

**Fig. S4** LC-MS (ESI) measurement of compound **2**.

### Compound 3 (fluorescein-labeled PCNA binding peptide)

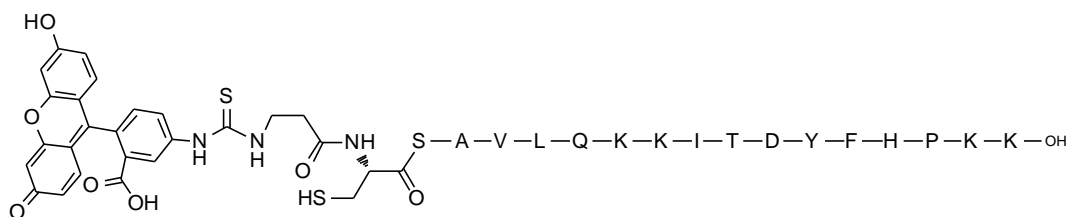

Chemical Formula: C<sub>116</sub>H<sub>164</sub>N<sub>26</sub>O<sub>30</sub>S<sub>2</sub>

Exact Mass: 2465,15

Molecular Weight: 2466,83

**Fig. S5:** Amino acid sequence and chemical structure of fluorescein-labeled PCNA binding peptide **3**.

5

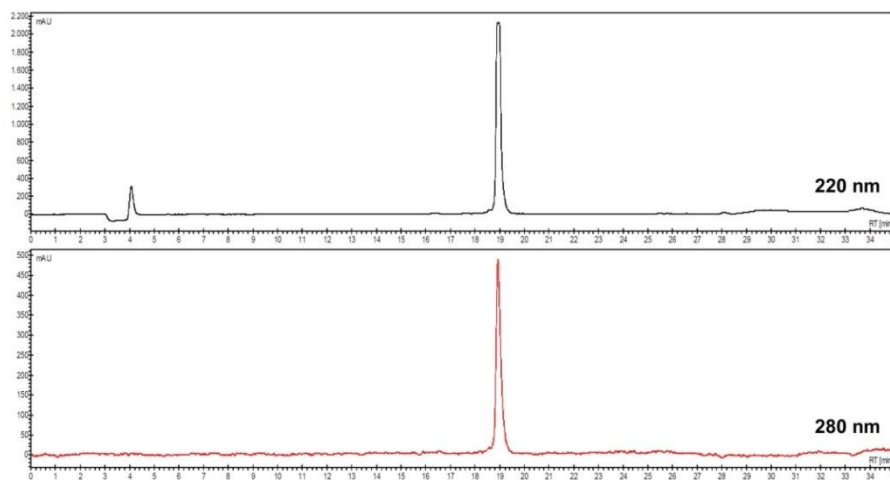

**Fig. S6:** Analytical RP-HPLC traces of FITC-labeled PCNA binding peptide **3** (Varian 940-LC equipped with a *Phenomenex* Luna C<sub>18</sub> column (5u, 100 A, 250×4.60 mm, 5 μm). Eluent A: 0.1% aq. trifluoroacetic acid (TFA), eluent B: 90 % aq. acetonitrile in 0.1% aq. TFA; 25 → 50% B in 20 min preceded by 5 min isocratic 25 % B at a flow rate of 1 mL min<sup>-1</sup>).

15

20

25

<Chromatogram>

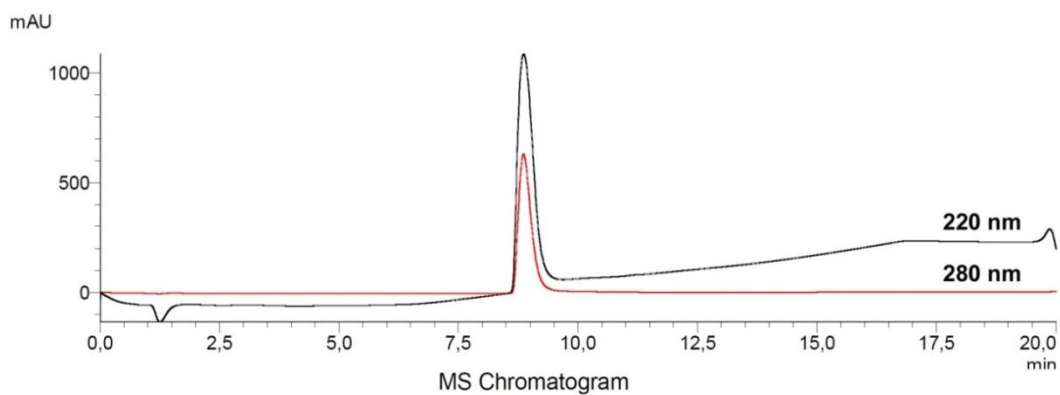

Segment#1 (x10.000.000)

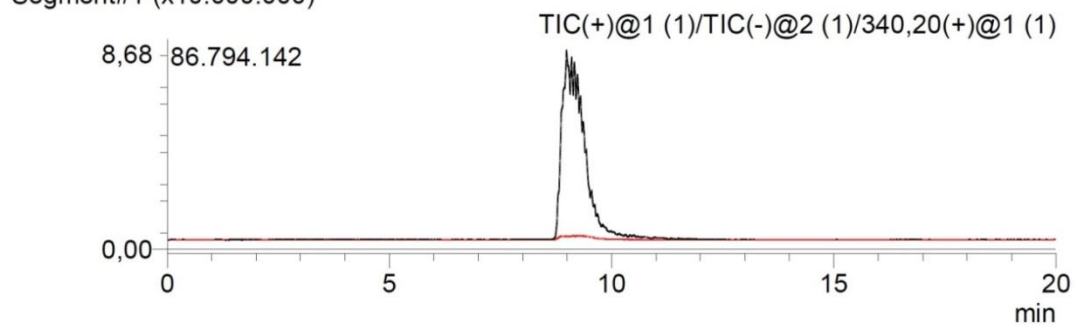

Averaged, 8,900 - 9,350, +

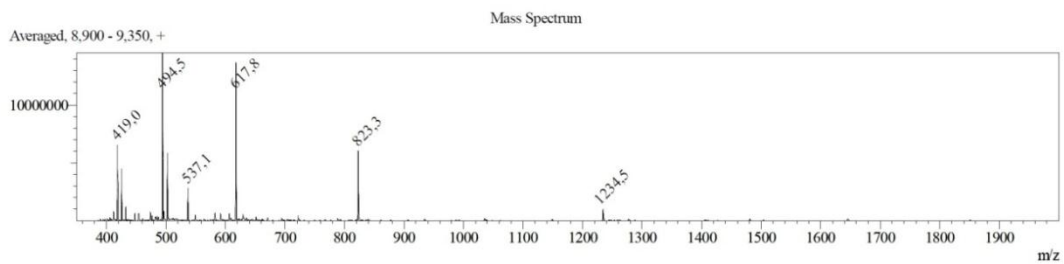

**Fig. S7:** LC-MS (ESI) measurement of the purified fluorescein-labeled PCNA binding peptide **3**.

5

10

### Compound 4 (fluorescently labeled PCNA binding peptide coupled to Fmoc-L-cysteine heptaamino-COSS)

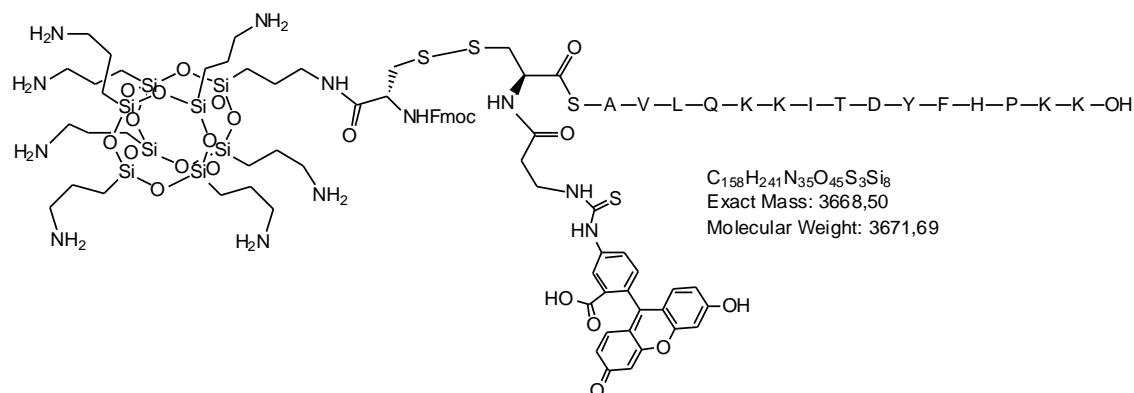

5

Fig. S8: Chemical structure of compound 4.

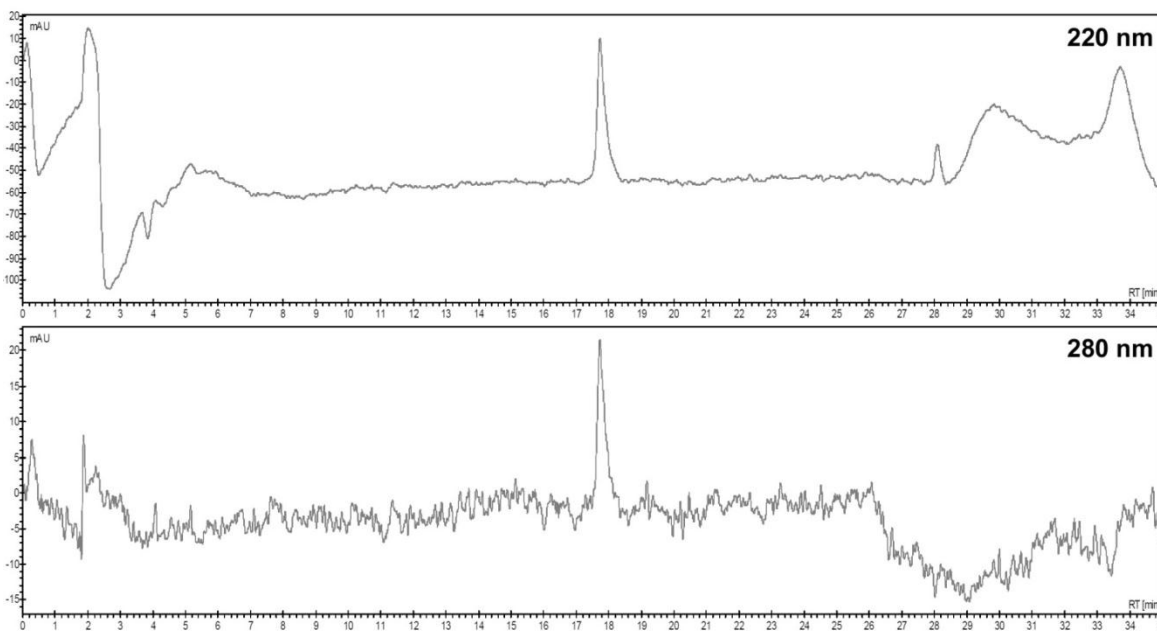

10

Fig. S9: Analytical RP-HPLC traces of compound 4 (Varian 940-LC equipped with a Phenomenex Luna  $C_{18}$  column (5 $\mu$ , 100 Å, 250×4.60 mm, 5  $\mu$ m). Eluent A: 0.1% aq. trifluoroacetic acid (TFA), eluent B: 90 % aq. acetonitrile in 0.1% aq. TFA; 25 → 50% B in 20 min preceded by 5 min isocratic 10 % B at a flow rate of 1 mL min<sup>-1</sup>).

15

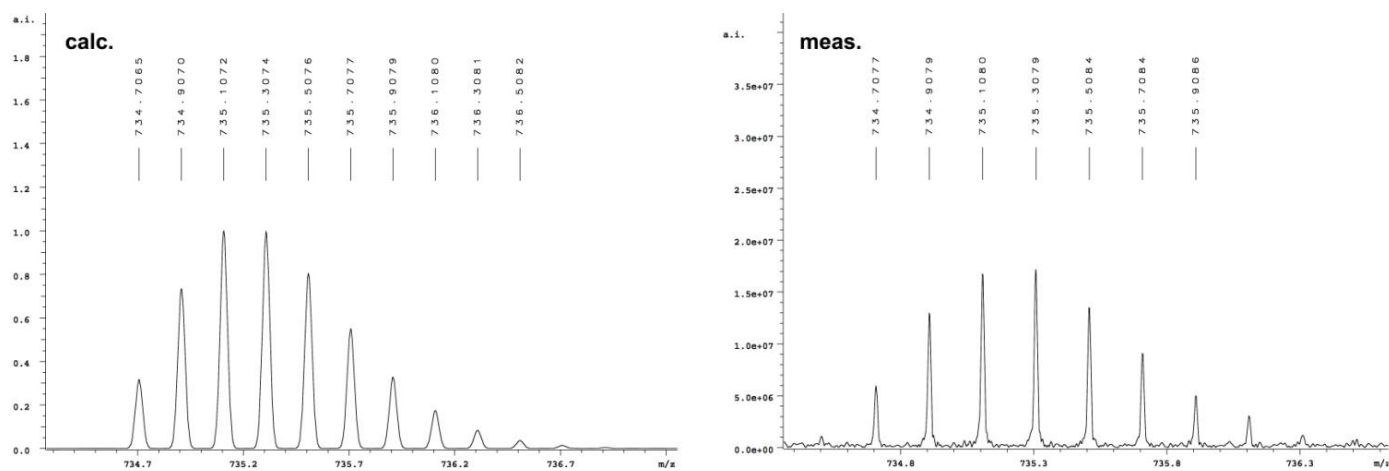

**Fig. S10:** HR-MS measurement of compound **4**; left: calculated isotopic pattern  $[M+5H]^{5+} = 734.7065$ ; right: measured isotopic pattern  $[M+5H]^{5+} = 734.7077$ .

5

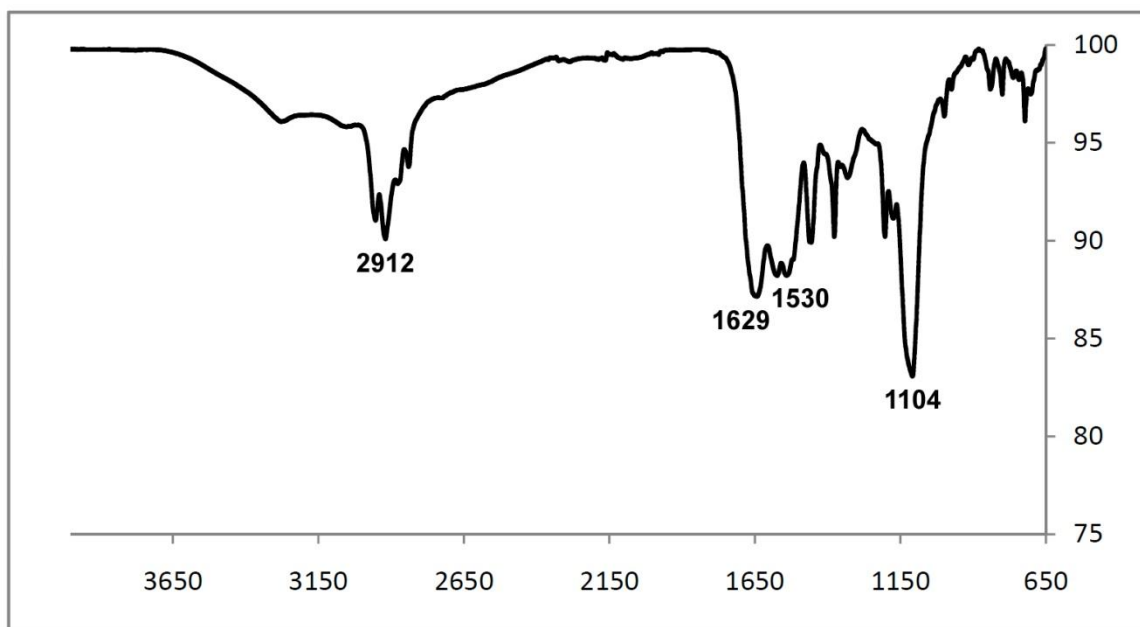

**Fig. S11:** FT-IR spectrum of compound **4**.

10

15

**Compound 5 (cysteine- $\beta$ -alanine-fluorescein heptaamino-COSS), 5a (cysteine-(S-trityl)- $\beta$ -alanine-fluorescein), and 5b (cysteine-(S-trityl)- $\beta$ -alanine-fluorescein heptaamino-COSS)**

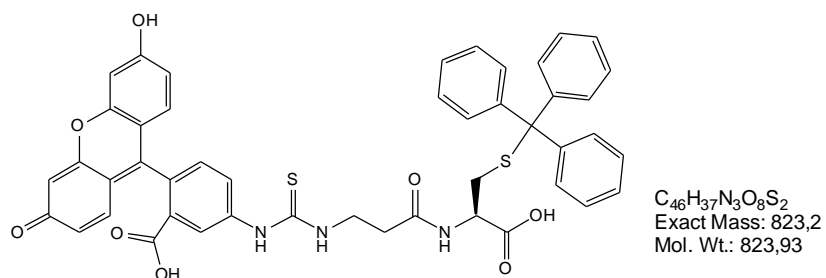

5

**Fig. S12:** Chemical structure of compound **5a**.

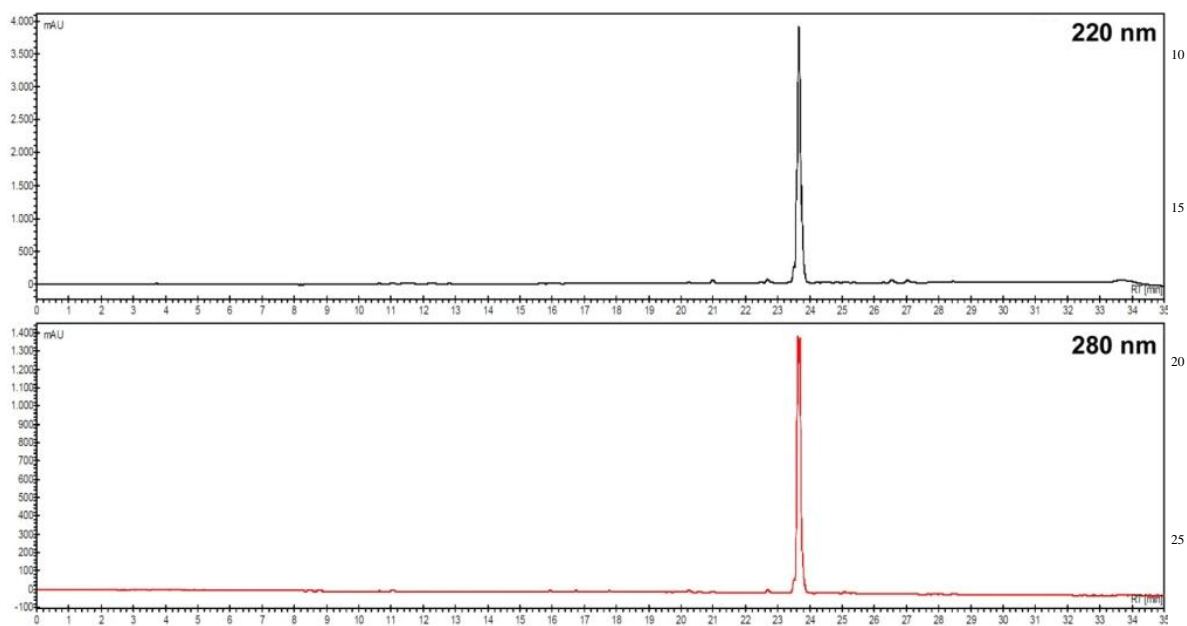

**Fig. S13:** Analytical RP-HPLC traces of compound **5a**. (Varian 940-LC equipped with a *Phenomenex* Luna  $C_{18}$  column (5 $\mu$ , 100 A, 250 $\times$ 4.60 mm, 5  $\mu$ m). Eluent A: 0.1% aq. trifluoroacetic acid (TFA), eluent B: 90 % aq. acetonitrile in 0.1% aq. TFA; 10  $\rightarrow$  100% B in 20 min preceded by 5 min isocratic 10 % B at a flow rate of 1 mL min $^{-1}$ ).



<Chromatogram>

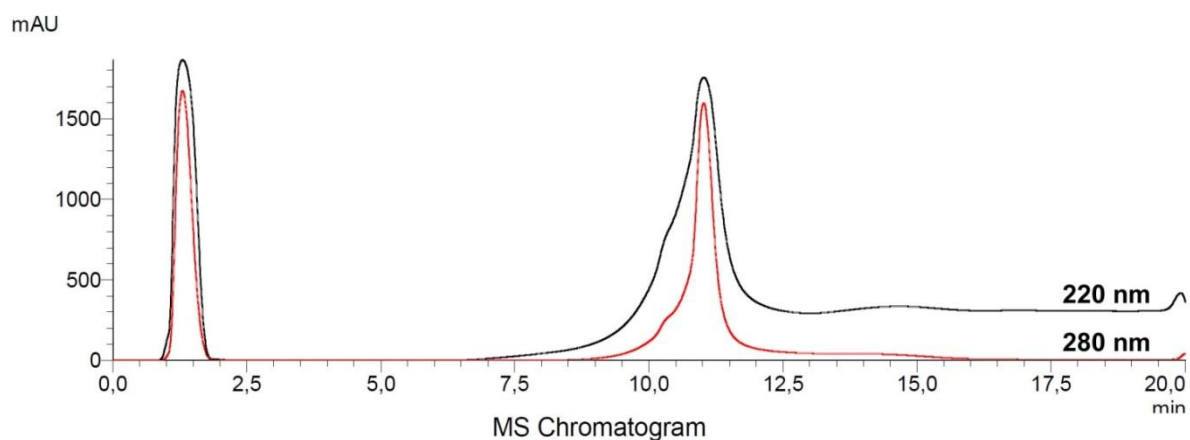

Segment#1 (x1.000.000)

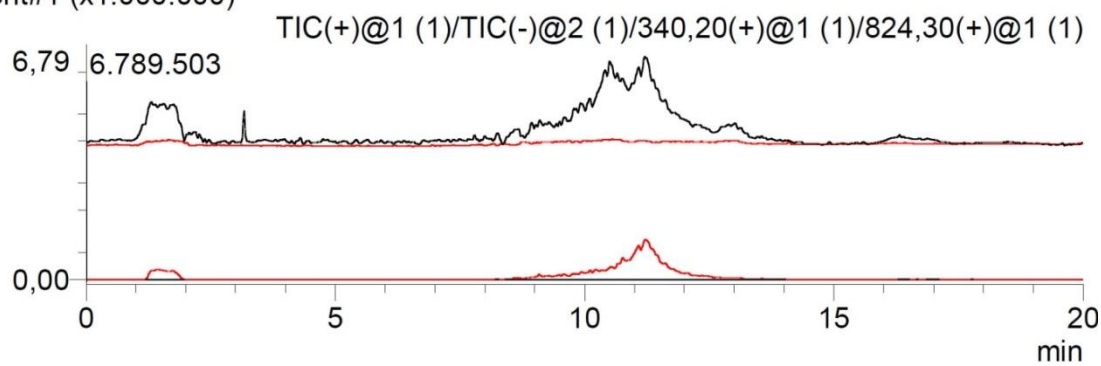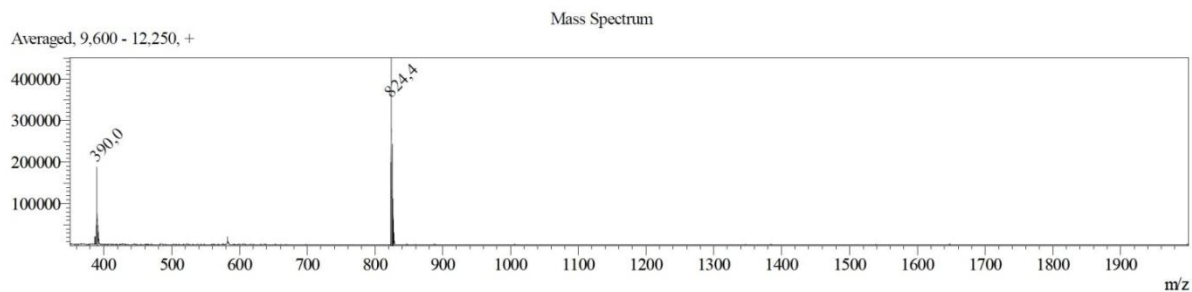

**Fig. S14:** LC-MS (ESI) measurement of compound **5a**.

5

10

Supplemental Information

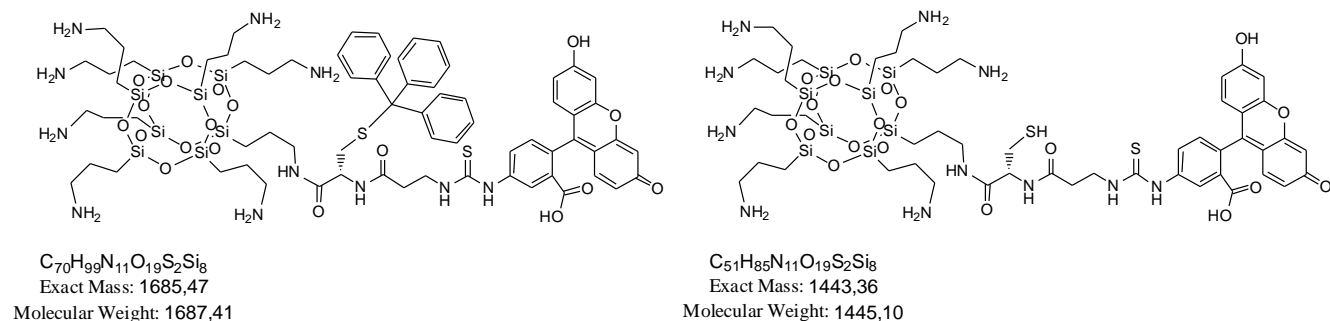

**Fig. S15:** Chemical structures of trityl protected **5b** (left) and unprotected cysteine- $\beta$ -alanine-fluorescein heptaamino-COSS **5** (right).

<Chromatogram>

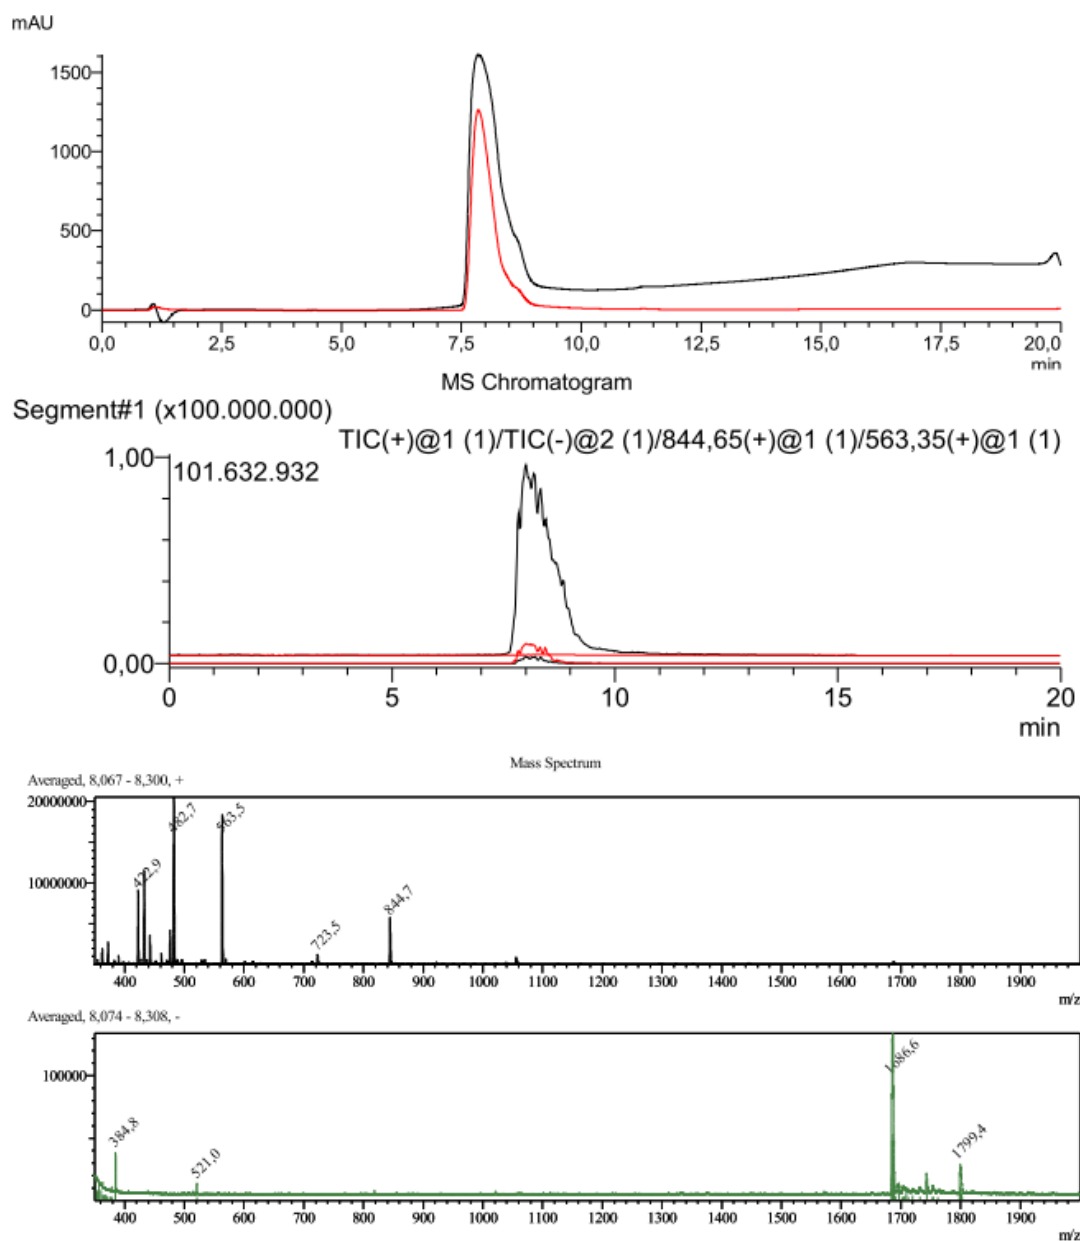

**Fig. S16:** LC-MS (ESI) measurement of cysteine-(S-trityl)- $\beta$ -alanine-fluorescein heptaamino-COSS **5b**.

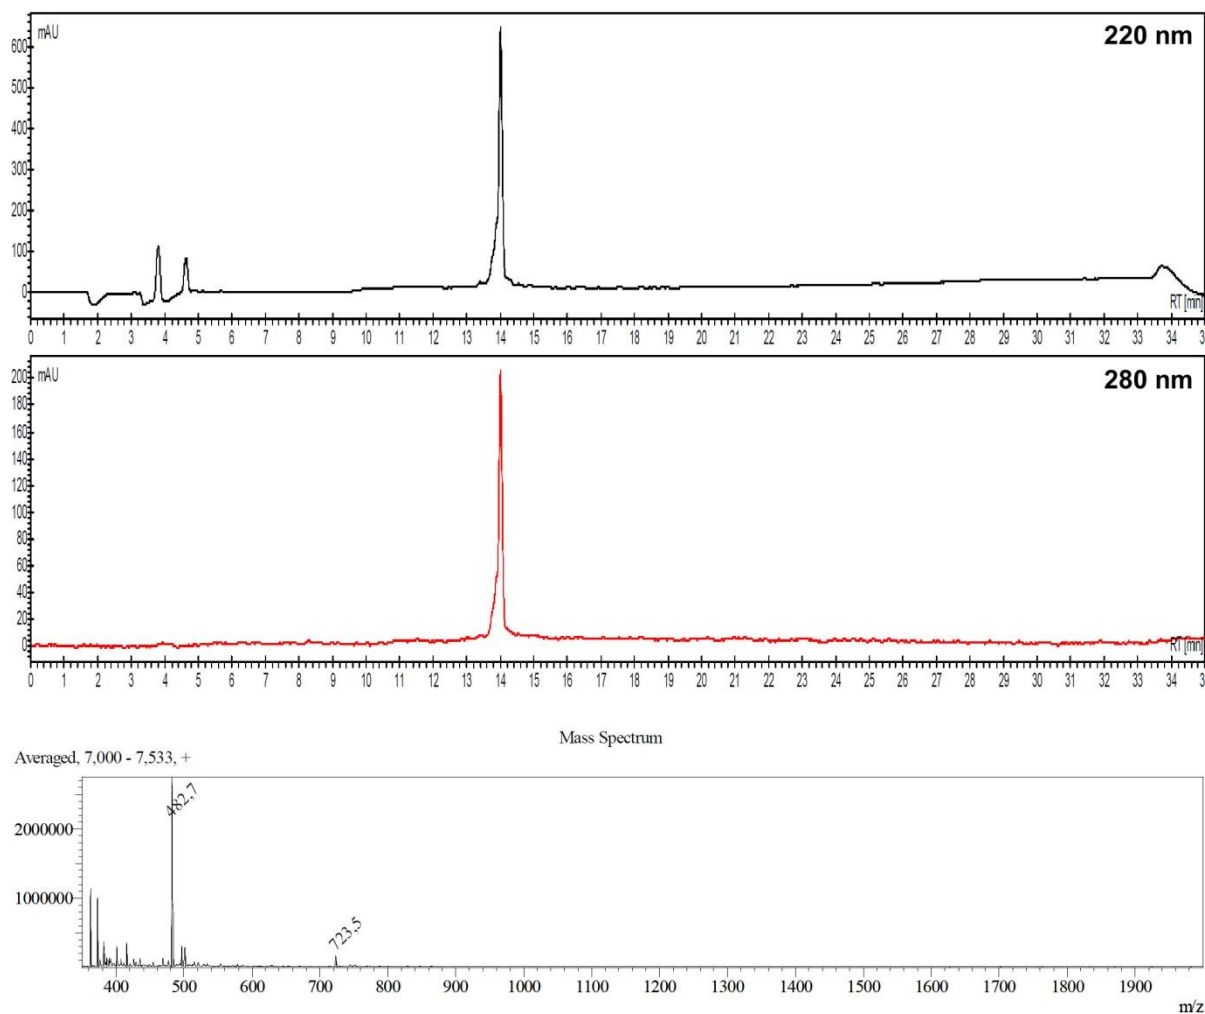

**Fig. S17:** Analytical RP-HPLC traces (*Varian 940-LC* equipped with a *Phenomenex Luna C<sub>18</sub>* column (5 $\mu$ , 100 A, 250 $\times$ 4.60 mm, 5  $\mu$ m). Eluent A: 0.1% aq. trifluoroacetic acid (TFA), eluent B: 90 % aq. acetonitrile in 0.1% aq. TFA; 10  $\rightarrow$  100% B in 20 min preceded by 5 min isocratic 10 % B at a flow rate of 1 mL min<sup>-1</sup>) and MS analysis of cysteine- $\beta$ -alanine-fluorescein heptaamino-COSS **5**.

5

### Microirradiation experiment and subsequent co-localization of fluorescently labeled PCNA binding peptide and RFP labeled PCNA after the addition of compound **4**

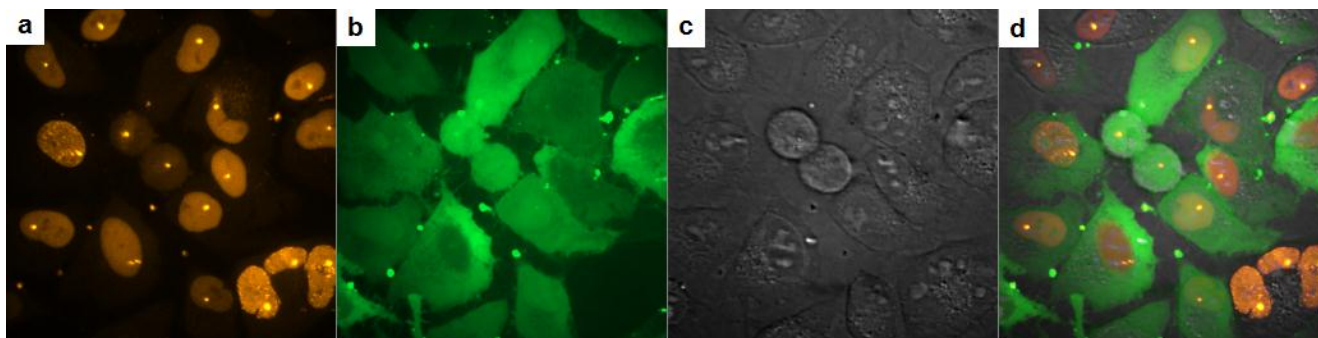

10

**Fig. S18:** Fluorescence microscopic analysis of irradiated HeLa cells 30 minutes after the addition of compound **4**. (a) PCNA (red); (b) cleaved fluorescein-labeled peptide **3** (green); (c) contrast image ; (d) overlay.
